# Supplementary material for: SETD4 expression is correlated with leukemic burden and SMYD2 transcription in acute lymphoblastic leukemia
Source: Research Square preprint supplement (doi:10.21203/rs.3.rs-6191336/v1), 2025-03-27
Supplement: Supplementary file 1 [file e6ef09e5be4f9d6d08730bfb.xlsx]

## Sheet: Folha1
Patients ID	Immunophenotype	white blood cell count at diagnosis	Cytogenetics	Immunophenotyping_1	Immunophenotyping_2	Immunophenotyping_3	BIOMOL	WBC D15	WBC D29	DATA FOLLOW-UP	Date of death	B-ACT	SETD4	SMYD2	Delta CT SETD4	Delta Delta CT SETD4	RQ SETD4	Delta CT SMYD2
20	B	300000	SC	1	2	1	2	2	1		26.10.2009	27.4579	31.826	32.4659	4.36818	-3.64912	12.5457	5.00799
30	B	67000	SC	1	2	1	0	2	1		06.06.2010	25.1336	26.0931	26.0577	0.959421	-7.05788	133.24	0.924082
33	T	51500	SC	2		0	0	2	1		10.09.2010	27.8386	33.1085	32.9519	5.26995	-2.74735	6.71484	5.11334
35	B	366000	NORMAL	1	1	0	0	1	1		03.09.2009	23.8328	25.1198	24.8623	1.28703	-6.73028	106.173	1.02952
36	T		SC	2			0	2	2		26.02.2010	26.597	29.9028	29.1357	3.30582	-4.71148	26.1997	2.53871
46	B	24000	SC	1	2	1	1	1	1	22.07.2012		22.7883	30.951	29.2441	8.16263	0.145325	0.904176	6.45576
49	B		NORMAL	1	2	1	1	1	1	22.07.2012		22.8001	32.4566	30.5148	9.65648	1.63918	0.321039	7.71468
50	B	42900	NORMAL	1	2	1	1	2	1	22.07.2012		22.5002	28.9041	29.2994	6.40391	-1.61339	3.0597	6.79916
54	B	30000	NORMAL	1	2	1	0	2	1		20.07.2010	26.7598	29.053	31.2819	2.29314	-5.72416	52.8621	4.52204
58	T	1000000	NORMAL	2		0	0	2	1	22.07.2012		22.0475	30.5938	26.9108	8.54626	0.528954	0.693057	4.86331
59	B	201000	NORMAL	1	2	1	1	1	1	22.07.2012		21.5059	29.7333	27.2083	8.22741	0.210105	0.864475	5.70242
60	B	56000	NORMAL	1	2	1	2	1	1		01.02.2011	21.1652	30.5537	26.6633	9.38858	1.37128	0.386547	5.49813
62	T	70000	NORMAL	2		0	0	1	1		18.11.2010	22.147	30.4672	28.1917	8.32024	0.302941	0.810598	6.04467
66	B	2000	Hyperdiploid	1	2	1	0	1	1	22.07.2012		21.7738	29.4695	28.3357	7.69565	-0.321653	1.24976	6.56193
67	B	2020	NORMAL	1	2	1	1	1	1	22.07.2012		22.3622	31.8524	28.6064	9.49023	1.47293	0.36025	6.24427
69	T	150000	NORMAL	2			0	1	1	22.07.2012		23.1712	31.9007	28.703	8.72946	0.712161	0.610405	5.53173
70	B	1000	45XY, -7, -9, t(7;9)	1	2	1	0	1	1		10.06.2010	21.2174	30.209	26.9216	8.99166	0.97436	0.508966	5.70426
72	B	3960	NORMAL	1	2	1	1	2	1	22.07.2012		22.8594	30.8467	29.948	7.98727	-0.0300326	1.02104	7.08858
76	B	38000	NORMAL	1	2	0	0	2	1		06.08.2010	25.4752	29.8931	30.7863	4.41797	-3.59933	12.1201	5.31116
86	B	3990	NORMAL	1	2	1	1	2	1	22.07.2012		23.0616	30.3485	30.3239	7.28691	-0.730396	1.65909	7.2623
87	T	86200	NORMAL	2		0	0	2	1		09.11.2011	21.6409	31.0687	28.8416	9.42776	1.41046	0.376191	7.20065
88	B	30700	Hyperdiploid	1	2	1	0	3	2		10.05.2010	21.8467	30.2145	28.431	8.36774	0.350442	0.784344	6.58425
89	B	2400	Hyperdiploid	1	2	1	0	1	1	22.07.2012		23.7178	30.1213	29.744	6.40353	-1.61377	3.06052	6.02625
90	B	60000	SC	1	2	1	0	1	1		20.06.2010	27.1972	31.563	33.0431	4.36579	-3.65151	12.5665	5.84593
95	B	73000	NORMAL	1	2	1	0	1	1	22.07.2012		21.3208	27.7915	25.704	6.47078	-1.54652	2.92112	4.3832
96	B	800000	NORMAL	1	1	0	4	2	2		31.07.2010	22.4645	32.9906	29.4858	10.5261	2.50881	0.175701	7.02138
98	B	43900	NORMAL	1	2	1	1	1	1	22.07.2012		21.9547	28.4541	28.7691	6.4994	-1.5179	2.86373	6.81444
100	B	25000	NORMAL	1	2	1	0	1	1	22.07.2012		23.0444	30.2322	29.9792	7.18777	-0.829526	1.7771	6.93476
103	B	28200	SC	1	2	1	0	2	1	22.07.2012		22.5992	28.8712	28.2876	6.27197	-1.74533	3.35272	5.68843
104	B	58000	SC	1	2	1	2	1	1	22.07.2012		22.4894	31.5429	28.0749	9.05348	1.03618	0.487616	5.58556
105	T	1160	DEL(2)	2		1	0	2	1		05.05.2011	27.3392	31.4792	31.493	4.14001	-3.87729	14.6954	4.15385
108	B	114000	SC	1	2	1	1	1	1	22.07.2012		21.8624	29.3548	27.6293	7.49242	-0.524881	1.43881	5.76692
110	B		NORMAL	1	2	1	0	1	1	22.07.2012		24.4264	24.4923	24.1482	0.0658875	-7.95141	247.522	-0.278173
114	B	14000	DEL(14)	1	2	1	0	3	1	22.07.2012		23.0022	28.1766	27.9424	5.17442	-2.84288	7.17452	4.94018
119	B	5810	SC	1	2	1	0	1	1	22.07.2012		21.5095	29.7876	26.3544	8.27816	0.260855	0.834593	4.84495
123	B	12200	NORMAL	1	2	1	0	2	1	22.07.2012		23.4783	31.0019	28.4362	7.52364	-0.493659	1.40801	4.95799
126	B	18200	NORMAL	1	2	1	1	3	1	22.07.2012		23.0832	28.3339	29.2911	5.25069	-2.76661	6.80505	6.20793
127	B	5890	NORMAL	1	2	1	1	1	1	22.07.2012		22.5436	28.3637	29.1986	5.8201	-2.1972	4.58588	6.65496
128	B	3390	NORMAL	1	2	1	1	1	1	22.07.2012		21.9173	30.7321	28.6646	8.81481	0.797507	0.575343	6.74724
136	B		SC	1	2	1	0	2	1		06.09.2011	26.73	29.5136	30.8681	2.78357	-5.23373	37.6279	4.13807
144	B	11200	NORMAL	1	2	1	0	1	1	22.07.2012		21.3733	27.4248	30.0915	6.05143	-1.96587	3.90648	8.71812
146	B	18700	NORMAL	1	2	1	0	1	1	22.07.2012		24.6898	28.2639	30.7815	3.57415	-4.44315	21.7531	6.0917
147	B		NORMAL	1	2	1	0	2	2		02.03.2011	27.2862	29.2176	31.8771	1.93136	-6.08594	67.9282	4.59095
149	B	6470	Hyperdiploid	1	2	1	0	3	1	22.07.2012		24.9346	29.9693	32.4132	5.03468	-2.98262	7.90422	7.47853
151	B	5040	NORMAL	1	2	1	0	1	1	22.07.2012		21.5197	27.7287	30.0291	6.20898	-1.80832	3.50234	8.5094
156	B	40800	SC	1	2	1	0	1	1	22.07.2012		24.2918	28.6	30.1883	4.30812	-3.70918	13.079	5.89641
160	B	3060	NORMAL	1	2	1	1	1	1	22.07.2012		22.731	31.3555	32.427	8.62458	0.607281	0.656433	9.696
168	T	500000	NORMAL	2		1	0	1	1	22.07.2012		20.541	28.9668	27.2663	8.4258	0.408501	0.753406	6.7253
170	B	58000	NORMAL	1	2	1	0	2	1	22.07.2012		20.7291	27.8414	29.4198	7.11226	-0.905042	1.8726	8.69068
186	B	15900	NORMAL	1	2	1	0	1	1		09.09.2011	21.7174	27.5659	26.5968	5.84849	-2.16882	4.49654	4.87943
192	B	34500	47XXY	1	2	1	0	1	1	22.07.2012		21.5634	25.179	27.0248	3.61555	-4.40175	21.1378	5.46141
196	B		SC	1	2	1	0	1	1	22.07.2012		22.6545	30.5095	30.6258	7.85498	-0.162319	1.11908	7.97128
197	B		SC	1	2	1	0	1	1		05.11.2011	23.7	31.9291	30.0994	8.2291	0.2118	0.863459	6.39934
209	B	4990	NORMAL	1	2	1	0	2	1	22.07.2012		24.6915	27.3053	26.7998	2.61374	-5.40356	42.3285	2.1083
211	B	5610	NORMAL	1	2	1	0	1	1	22.07.2012		24.3629	29.724	27.98	5.36107	-2.65623	6.30385	3.61708
215	B	136000	NORMAL	1	1	0	0	1	1	22.07.2012		24.1557	27.5858	26.2917	3.43011	-4.58719	24.0371	2.13601
216	B	1630	NORMAL	1	2	1	0	3	1	22.07.2012		22.698	31.4112	30.7038	8.7132	0.695897	0.617326	8.00579
219	T	310000	NORMAL	2		0	0	1	1		02.02.2011	23.9493	29.2541	28.9486	5.30482	-2.71248	6.55449	4.99934
244	B	2870	NORMAL	1	2	1	0	2	1	22.07.2012		21.8593	25.063	26.7343	3.20368	-4.81362	28.1218	4.87507
247	B	8960	NORMAL	1	2	1	0	2	1	22.07.2012		22.5357	26.732	28.6811	4.19633	-3.82097	14.1328	6.14547
249	B	3110	Hyperdiploid	1	2	1	0	2	1	22.07.2012		22.6125	25.6551	26.641	3.04257	-4.97473	31.4444	4.02844
254	B	3620	NORMAL	1	2	1	2	1	1	22.07.2012		22.0684	26.8356	26.2533	4.7672	-3.2501	9.51429	4.18481
256	T	236000	SC	2		0	0	1	1	22.07.2012		22.098	27.1209	26.6907	5.02294	-2.99436	7.96878	4.59273
257	B		SC	1	2	1	1	1	1	22.07.2012		24.2327	27.5265	29.727	3.29383	-4.72347	26.4185	5.49434
259	B	20140	NORMAL	1	2	1	1	2	1	22.07.2012		22.2196	27.1414	28.9698	4.92184	-3.09546	8.54725	6.75015
264	B		NORMAL	1	2	1	2	1	1	22.07.2012		22.0451	26.2076	25.8696	4.16253	-3.85478	14.4678	3.82451
268	B	80000	NORMAL	1	2	1	2	2	1	22.07.2012		23.6269	27.1298	27.1508	3.50286	-4.51444	22.855	3.52387
270	B	41500	NORMAL	1	2	1	0	1	1	22.07.2012		22.2564	29.022	28.4308	6.76552	-1.25178	2.38136	6.17435
277	B	75400	Hyperdiploid	1	2	1	0	1	1	22.07.2012		22.7223	28.2812	27.6723	5.55885	-2.45845	5.49626	4.95
282	B		SC	1			0	1	1	22.07.2012		28.0206	31.3251	32.0873	3.3045	-4.7128	26.2238	4.06661
283	T		SC	2		0	0	3			30.03.2011	26.1319	25.3252	26.2796	-0.806717	-8.82402	453.204	0.147676
292	B	67400	NORMAL	1	2	1	1	1	1	22.07.2012		26.6055	29.4789	32.648	2.87343	-5.14387	35.3557	6.04254
298	T	209000	NORMAL	2		1	0	1	1	22.07.2012		28.9058	29.2627	30.6949	0.356949	-7.66035	202.3	1.78912
299	B	92000	NORMAL	1	2	1	0	1	1	22.07.2012		23.1282	25.7646	26.5409	2.63642	-5.38088	41.6683	3.41273
305	B	8240	NORMAL	1	2	1	0	1	1	22.07.2012		26.7566	28.3349	30.6783	1.5783	-6.439	86.7623	3.9217
309	B		NORMAL	1	2	1	0	1	1	22.07.2012		24.7854	26.389	27.953	1.60359	-6.41371	85.2551	3.16755
310	B		NORMAL	1	2	1	2	3	3	22.07.2012		25.8201	24.6646	22.9206	-1.15546	-9.17276	577.132	-2.89951
311	B	9680	SC	1	2	1	1	1	1	22.07.2012		25.3279	22.1807	25.5167	-3.14725	-11.1645	2295.43	0.188818
315	B	3100	SC	1	2	0	0	1	1	22.07.2012		26.5506	26.9624	29.558	0.411766	-7.60553	194.757	3.00745
316	B	109000	NORMAL	1	2	0	2	1	1	22.07.2012		23.8065	26.7282	26.4042	2.92166	-5.09564	34.1933	2.59773
322	B	60000	t(9;22)	1	2	1	3	1	1	22.07.2012		25.8515	22.4473	23.6723	-3.4042	-11.4215	2742.92	-2.1792
331	B	81800	SC	1	2	1	1	1	1	22.07.2012		24.3563	22.8642	26.356	-1.49206	-9.50936	728.791	1.99977
333	B		SC	1	2	1	0	1	1	22.07.2012		25.5586	24.5221	24.0122	-1.03641	-9.05371	531.422	-1.54637
